# Supplementary material for: Importance of molecular tools in arbovirus and malaria disease coinfection detection in humans, Bobo- Dioulasso, western Burkina Faso
Source: Research Square preprint supplement (doi:10.21203/rs.3.rs-7658090/v1), 2025-09-30
Supplement: Supplementary file 1 [file 5fabe0013ce1f2821d386101.xlsx]

## Sheet: Data base
Socio-demographic data																						Type of sample		J DDS	TDR	Result Molecular method		Serotypes
ID	Inclusion site	Region	Age (year)	Sex	provenance	Fever °C	Headache	Abdominal pain	Joint pain	Muscular pain	Lombalgie	Retroorbitral pain	Asthenia	Conjunctival hyperemia	Skin rash	Edema of the extremities	Hemorrhage	neurological sign	Pregnancy	Microscopy malaria	PCR malaria	Plasma	Serum		DEN NS1/IgM/IgG	mRT-PCR	mRT-qPCR
E001	CME	Haut Bassins	3	M	BOBO SECT	OUI	OUI	non	OUI	OUI	OUI	NON	OUI	NON	NON	NON	NON	Nèant	NON	GE POSITIF	Positif		OUI		Negatif	Negatif
E002	CME	Haut Bassins	84	M	BOBO SECT	OUI	OUI	non	OUI	OUI	OUI	NON	OUI	NON	NON	NON	NON	Nèant	NON	GE POSITIF	Positif		OUI		Negatif	Negatif
E003	CME	Haut Bassins	24	M	BOBO SECT	OUI	OUI	non	OUI	OUI	Non	NON	OUI	NON	NON	NON	NON	Nèant	NON	GE POSITIF	Positif		OUI		Negatif	Negatif
E004	CME	Haut Bassins	33	F	BOBO SECT	OUI	OUI	non	OUI	OUI	OUI	NON	OUI	NON	NON	NON	NON	Nèant	NON	GE Negatif	Negatif		OUI		Negatif	Negatif
E005	CME	Haut Bassins	3	M	BOBO SECT	OUI	OUI	non	non	NON	OUI	NON	OUI	NON	NON	NON	NON	Nèant	NON	GE Negatif	Negatif		OUI		Negatif	Negatif
E006	CME	Haut Bassins	31	F	BOBO SECT	OUI	OUI	non	non	OUI	OUI	NON	OUI	NON	NON	NON	NON	Nèant	NON	GE Negatif	Negatif		OUI		Negatif	Negatif
E007	CME	Haut Bassins	28	M	BOBO SECT	OUI	OUI	non	non	OUI	Non	NON	OUI	NON	NON	NON	NON	Nèant	NON	GE Negatif	Negatif		OUI		Negatif	Negatif
E008	CME	Haut Bassins	60	F	BOBO SECT	OUI	OUI	oui	non	NON	OUI	NON	OUI	NON	NON	NON	NON	Nèant	NON	GE Negatif	Positif		OUI		Negatif	Negatif
E009	CME	Haut Bassins	73	M	BOBO SECT	OUI	non	non	non	OUI	OUI	NON	OUI	NON	NON	NON	NON	Nèant	NON	GE Negatif	Negatif		OUI		Negatif	Negatif
E010	CME	Haut Bassins	37	F	BOBO SECT	OUI	OUI	non	OUI	OUI	Non	NON	OUI	NON	NON	NON	NON	Nèant	NON	GE Negatif	Negatif		OUI		Negatif	Negatif
E011	CME	Haut Bassins	72	M	BOBO SECT	OUI	non	non	OUI	NON	OUI	NON	non	NON	NON	NON	NON	Nèant	NON	GE Negatif	Negatif		OUI		Negatif	Negatif
E012	CME	Haut Bassins	24	F	BOBO SECT	OUI	OUI	oui	OUI	OUI	Non	NON	OUI	NON	NON	NON	NON	Nèant	NON	GE Negatif	Negatif		OUI		Negatif	Negatif
E013	CME	Haut Bassins	12	M	BOBO SECT	non	OUI	non	OUI	NON	OUI	OUI	OUI	NON	NON	NON	NON	Nèant	NON	GE Negatif	Negatif		OUI		Negatif	Negatif
E014	CME	Haut Bassins	17	M	BOBO SECT	OUI	OUI	non	OUI	OUI	OUI	NON	OUI	NON	NON	NON	NON	Nèant	NON	GE Negatif	Negatif		OUI		Negatif	Negatif
E015	CME	Haut Bassins	40	M	BOBO SECT	OUI	OUI	oui	non	NON	OUI	NON	OUI	NON	NON	NON	NON	Nèant	NON	GE Negatif	Negatif		OUI		Negatif	Negatif
E016	CME	Haut Bassins	47	M	BOBO SECT	OUI	OUI	non	OUI	OUI	OUI	NON	OUI	NON	NON	NON	NON	Nèant	NON	GE Negatif	Negatif		OUI		Negatif	Negatif
E017	CME	Haut Bassins	84	M	BOBO SECT	OUI	OUI	non	OUI	OUI	OUI	NON	OUI	NON	NON	NON	NON	Nèant	NON	GE Negatif	Negatif		OUI		Negatif	Negatif
E018	CME	Haut Bassins	32	M	BOBO SECT	oui	OUI	non	non	non	Non	OUI	OUI	NON	NON	NON	NON	NEANT	NON	GE POSITIF	Positif		OUI		Negatif	Negatif
E019	CME	Haut Bassins	27	F	BOBO SECT	OUI	OUI	non	OUI	OUI	OUI	NON	non	NON	NON	NON	NON	Nèant	NON	GE Negatif	Negatif		OUI		Negatif	Negatif
E020	CME	Haut Bassins	39	F	BOBO SECT	non	OUI	non	OUI	NON	OUI	NON	OUI	NON	NON	NON	NON	Nèant	NON	GE POSITIF	Positif		OUI		Negatif	Negatif
E021	CME	Haut Bassins	37	M	BOBO SECT	OUI	non	non	non	OUI	OUI	NON	OUI	NON	NON	NON	NON	Nèant	NON	GE POSITIF	Positif		OUI		Negatif	Negatif
E022	CME	Haut Bassins	53	F	BOBO SECT	OUI	OUI	non	OUI	OUI	Non	NON	non	NON	NON	NON	NON	Nèant	NON	GE Negatif	Negatif		OUI	9 J	IgM	Negatif
E023	CME	Haut Bassins	84	M	BOBO SECT	non	OUI	oui	OUI	OUI	OUI	NON	OUI	NON	NON	NON	NON	Nèant	NON	GE Negatif	Negatif		OUI		Negatif	Negatif
E024	CME	Haut Bassins	39	M	BOBO SECT	OUI	non	non	OUI	NON	Non	NON	OUI	NON	NON	NON	NON	Nèant	NON	GE Negatif	Negatif		OUI		Negatif	Negatif
E025	CME	Haut Bassins	58	M	BOBO SECT	OUI	OUI	non	non	OUI	OUI	NON	OUI	NON	NON	NON	NON	Nèant	NON	GE Negatif	Negatif		OUI		Negatif	Negatif
E026	CME	Haut Bassins	28	M	BOBO SECT	OUI	OUI	non	OUI	OUI	Non	NON	OUI	NON	NON	NON	NON	Nèant	NON	GE Negatif	Negatif		OUI	9 J	IgG	Negatif
E027	CME	Haut Bassins	34	M	BOBO SECT	OUI	OUI	non	OUI	NON	OUI	NON	OUI	NON	NON	NON	NON	Nèant	NON	GE Negatif	Negatif		OUI		Negatif	Negatif
E028	CME	Haut Bassins	2	M	BOBO SECT	OUI	OUI	non	OUI	OUI	Non	NON	OUI	NON	NON	NON	NON	Nèant	NON	GE POSITIF	Positif		OUI		Negatif	Negatif
E029	CME	Haut Bassins	27	F	BOBO SECT	non	OUI	oui	OUI	OUI	OUI	NON	OUI	NON	NON	NON	NON	Nèant	NON	GE Negatif	Negatif		OUI		Negatif	Negatif
E030	CME	Haut Bassins	29	M	BOBO SECT	OUI	OUI	non	OUI	OUI	OUI	NON	OUI	NON	NON	NON	NON	Nèant	NON	GE Negatif	Negatif		OUI		Negatif	Negatif
E031	CME	Haut Bassins	30	F	BOBO SECT	OUI	OUI	non	OUI	OUI	Non	NON	OUI	NON	NON	NON	NON	Nèant	NON	GE Negatif	Negatif		OUI		Negatif	Negatif
E032	CME	Haut Bassins	24	M	BOBO SECT	OUI	OUI	non	non	OUI	OUI	NON	OUI	NON	NON	NON	NON	Nèant	NON	GE Negatif	Negatif		OUI		Negatif	Negatif
E033	CME	Haut Bassins	28	M	BOBO SECT	OUI	non	non	OUI	OUI	Non	NON	OUI	NON	NON	NON	NON	Nèant	NON	GE Negatif	Negatif		OUI		Negatif	Negatif
E034	CME	Haut Bassins	34	M	BOBO SECT	OUI	non	non	OUI	NON	OUI	NON	OUI	NON	NON	NON	NON	Nèant	NON	GE Negatif	Negatif		OUI		Negatif	Negatif
E035	CME	Haut Bassins	29	F	BOBO SECT	OUI	non	non	OUI	OUI	OUI	NON	OUI	NON	NON	NON	NON	Nèant	NON	GE POSITIF	Positif		OUI		Negatif	Negatif
E036	CME	Haut Bassins	43	F	BOBO SECT	non	non	non	non	OUI	Non	NON	OUI	NON	NON	NON	NON	Nèant	NON	GE Negatif	Negatif		OUI		Negatif	Negatif
E037	CME	Haut Bassins	45	M	BOBO SECT	OUI	non	non	OUI	NON	OUI	NON	OUI	NON	NON	NON	NON	Nèant	NON	GE Negatif	Negatif		OUI		Negatif	Negatif
E038	CME	Haut Bassins	18	F	BOBO SECT	OUI	OUI	non	OUI	OUI	OUI	NON	OUI	NON	NON	NON	NON	Nèant	NON	GE Negatif	Negatif		OUI		Negatif	Negatif
E039	CME	Haut Bassins	48	F	BOBO SECT	OUI	OUI	non	OUI	OUI	OUI	NON	OUI	NON	NON	NON	NON	Nèant	NON	positif	Positif		OUI	3 J	NS1	Positif		DENV3
E040	CME	Haut Bassins	35	M	BOBO SECT	OUI	OUI	non	OUI	OUI	Non	NON	OUI	NON	NON	NON	NON	Nèant	NON	GE Negatif	Negatif		OUI		Negatif	Negatif
E041	CME	Haut Bassins	33	M	BOBO SECT	OUI	OUI	non	OUI	NON	OUI	NON	OUI	NON	NON	NON	NON	Nèant	NON	GE Negatif	Positf		OUI		Negatif	Negatif
E042	CME	Haut Bassins	43	M	BOBO SECT	OUI	OUI	non	OUI	OUI	Non	NON	OUI	NON	NON	NON	NON	Nèant	NON	GE Negatif	Negatif		OUI		Negatif	Negatif
E043	CME	Haut Bassins	23	F	BOBO SECT	non	OUI	non	OUI	OUI	OUI	NON	OUI	NON	NON	NON	NON	Nèant	NON	GE Negatif	Negatif		OUI		Negatif	Negatif
E044	CME	Haut Bassins	27	F	BOBO SECT	non	OUI	non	non	NON	OUI	NON	non	NON	NON	NON	NON	Nèant	NON	GE Positif	Positif		OUI		Negatif	Negatif
E045	CME	Haut Bassins	42	F	BOBO SECT	OUI	OUI	oui	OUI	OUI	Non	NON	OUI	NON	NON	NON	NON	Nèant	NON	GE Negatif	Negatif		OUI		Negatif	Negatif
E046	CME	Haut Bassins	28	F	BOBO SECT	OUI	OUI	non	OUI	OUI	OUI	NON	OUI	NON	NON	NON	NON	Nèant	NON	GE POSITIF	Positif		OUI		Negatif	Negatif
E047	CME	Haut Bassins	12	F	BOBO SECT	non	OUI	non	OUI	OUI	Non	NON	OUI	NON	NON	NON	NON	Nèant	NON	GE POSITIF	Positif		OUI		Negatif	Negatif
E048	CME	Haut Bassins	12	M	BOBO SECT	OUI	non	non	non	OUI	OUI	NON	OUI	NON	NON	NON	NON	Nèant	NON	GE Negatif	Negatif		OUI	11 J	IgM	Negatif
E049	CME	Haut Bassins	75	F	BOBO SECT	non	OUI	non	non	OUI	Non	NON	OUI	NON	NON	NON	NON	Nèant	NON	GE Negatif	Negatif		OUI		Negatif	Negatif
E050	CME	Haut Bassins	13	M	BOBO SECT	OUI	OUI	non	non	OUI	OUI	NON	OUI	NON	NON	NON	NON	Nèant	NON	GE POSITIF	Positif		OUI		Negatif	Negatif
E051	CME	Haut Bassins	62	F	BOBO SECT	OUI	OUI	non	non	OUI	OUI	OUI	OUI	NON	NON	NON	NON	Nèant	NON	GE POSITIF	Positif		OUI	8 J	IgM	Negatif
E052	CME	Haut Bassins	5	F	BOBO SECT	OUI	OUI	oui	OUI	OUI	OUI	NON	OUI	NON	NON	NON	NON	Nèant	NON	GE Negatif	Negatif		OUI		Negatif	Negatif
E053	CME	Haut Bassins	42	M	BOBO SECT	OUI	OUI	non	OUI	OUI	Non	NON	OUI	NON	NON	NON	NON	Nèant	NON	GE Negatif	Negatif		OUI		Negatif	Negatif
E054	CME	Haut Bassins	35	F	BOBO SECT	OUI	non	non	non	NON	OUI	NON	OUI	NON	NON	NON	NON	Nèant	NON	GE Negatif	Negatif		OUI		Negatif	Negatif
E055	CME	Haut Bassins	29	F	BOBO SECT	non	non	non	OUI	OUI	Non	NON	OUI	NON	NON	NON	NON	Nèant	NON	GE Negatif	Negatif		OUI		Negatif	Negatif
E056	CME	Haut Bassins	24	M	BOBO SECT	OUI	non	non	OUI	OUI	OUI	OUI	OUI	NON	NON	NON	NON	Nèant	NON	GE Negatif	Negatif		OUI		Negatif	Negatif
E057	CME	Haut Bassins	46	M	BOBO SECT	OUI	non	oui	OUI	NON	Non	NON	OUI	NON	NON	NON	NON	Nèant	NON	GE Negatif	Negatif		OUI		Negatif	Negatif
E058	CME	Haut Bassins	39	F	BOBO SECT	OUI	non	non	OUI	OUI	OUI	NON	OUI	NON	NON	NON	NON	Nèant	NON	GE Negatif	Negatif		OUI		Negatif	Negatif
E059	CME	Haut Bassins	8	M	BOBO SECT	non	non	non	Non	NON	OUI	NON	OUI	NON	NON	NON	NON	Nèant	NON	GE POSITIF	Positif		OUI		Negatif	Negatif
E060	CME	Haut Bassins	26	M	BOBO SECT	OUI	OUI	non	Non	OUI	Non	NON	OUI	NON	NON	NON	NON	Nèant	NON	GE POSITIF	Positif		OUI		Negatif	Negatif
E061	CME	Haut Bassins	31	M	BOBO SECT	OUI	OUI	non	Non	NON	OUI	NON	OUI	NON	NON	NON	NON	Nèant	NON	GE POSITIF	Positif		OUI		Negatif	Negatif
E062	CME	Haut Bassins	60	F	BOBO SECT	non	OUI	non	Non	OUI	Non	NON	OUI	NON	NON	NON	NON	Nèant	NON	GE Negatif	Negatif		OUI		Negatif	Negatif
E063	CME	Haut Bassins	27	M	BOBO SECT	OUI	OUI	non	OUI	OUI	OUI	OUI	OUI	NON	NON	NON	NON	Nèant	NON	GE POSITIF	Positif		OUI		Negatif	Negatif
E064	CME	Haut Bassins	42	F	BOBO SECT	OUI	OUI	non	OUI	OUI	Non	NON	OUI	NON	NON	NON	NON	Nèant	NON	GE Negatif	Negatif		OUI		Negatif	Negatif
E065	CME	Haut Bassins	18	F	BOBO SECT	OUI	OUI	non	OUI	OUI	OUI	NON	OUI	NON	NON	NON	NON	Nèant	NON	positif	Positif		OUI	2 J	NS1 + IgG	Positif		DENV3
E066	CME	Haut Bassins	57	M	BOBO SECT	OUI	OUI	oui	OUI	OUI	OUI	NON	OUI	NON	NON	NON	NON	Nèant	NON	GE Negatif	Negatif		OUI	9 J	IgM	Negatif
E067	CME	Haut Bassins	24	M	BOBO SECT	OUI	OUI	non	OUI	OUI	Non	NON	OUI	NON	NON	NON	NON	Nèant	NON	GE Negatif	Positif		OUI	4 J	NS1	Positif		DENV1
E068	CME	Haut Bassins	6	M	BOBO SECT	OUI	OUI	non	OUI	non	OUI	NON	OUI	NON	NON	NON	NON	Nèant	NON	GE POSITIF	Positif		OUI		Negatif	Negatif
E069	CME	Haut Bassins	27	M	BOBO SECT	OUI	OUI	oui	OUI	OUI	Non	NON	OUI	NON	NON	NON	NON	Nèant	NON	GE POSITIF	Positif		OUI		Negatif	Negatif
E070	CME	Haut Bassins	8	F	BOBO SECT	OUI	non	non	non	OUI	OUI	OUI	OUI	NON	NON	NON	NON	Nèant	NON	GE Negatif	Negatif		OUI		Negatif	Negatif
E071	CME	Haut Bassins	47	F	BOBO SECT	OUI	non	non	OUI	NON	OUI	NON	OUI	NON	NON	NON	NON	Nèant	NON	GE POSITIF	Positif		OUI		Negatif	Negatif
E072	CME	Haut Bassins	18	M	BOBO SECT	non	OUI	non	OUI	OUI	OUI	NON	OUI	NON	NON	NON	NON	Nèant	NON	GE Negatif	Negatif		OUI	2 J	NS1	Positif		DENV1
E073	CME	Haut Bassins	17	M	BOBO SECT	OUI	OUI	non	OUI	OUI	OUI	NON	OUI	NON	NON	NON	NON	Nèant	NON	GE POSITIF	Positif		OUI	10 J	IgM	Negatif
E074	CME	Haut Bassins	37	M	BOBO SECT	OUI	non	non	OUI	OUI	OUI	NON	OUI	NON	NON	NON	NON	Nèant	NON	GE Negatif	Negatif		OUI		Negatif	Negatif
E075	CME	Haut Bassins	26	F	BOBO SECT	non	OUI	non	OUI	OUI	OUI	NON	OUI	NON	NON	NON	NON	Nèant	NON	GE Negatif	Negatif		OUI		Negatif	Negatif
E076	CME	Haut Bassins	67	M	BOBO SECT	OUI	OUI	non	OUI	NON	OUI	NON	OUI	NON	NON	NON	NON	Nèant	NON	GE POSITIF	Positif		OUI	9 J	IgM	Negatif
E077	CME	Haut Bassins	55	M	BOBO SECT	OUI	OUI	non	OUI	OUI	OUI	NON	OUI	NON	NON	NON	NON	Nèant	NON	GE Positif	Positif		OUI	11 J	IgG + IgM	Negatif
E078	CME	Haut Bassins	21	M	BOBO SECT	OUI	OUI	oui	OUI	OUI	Non	NON	OUI	NON	NON	NON	NON	Nèant	NON	GE POSITIF	Positif		OUI	10 J	IgM	Negatif
E079	CME	Haut Bassins	40	M	BOBO SECT	OUI	OUI	non	OUI	NON	OUI	NON	OUI	NON	NON	NON	NON	Nèant	NON	Negatif	Positif		OUI	3 J	NS1	Positif		DENV1
E080	CME	Haut Bassins	6	F	BOBO SECT	OUI	OUI	non	OUI	OUI	Non	NON	OUI	NON	NON	NON	NON	Nèant	NON	GE POSITIF	Positif		OUI		Negatif	Negatif
E081	CME	Haut Bassins	58	M	BOBO SECT	OUI	non	non	OUI	OUI	OUI	NON	OUI	NON	NON	NON	NON	Nèant	NON	GE Negatif	Negatif		OUI		Negatif	Negatif
E082	CME	Haut Bassins	24	M	BOBO SECT	OUI	OUI	non	OUI	NON	OUI	OUI	OUI	NON	NON	NON	NON	Nèant	NON	GE Negatif	Negatif		OUI		Negatif	Negatif
E083	CME	Haut Bassins	22	F	BOBO SECT	non	OUI	non	non	OUI	Non	NON	OUI	NON	NON	NON	NON	Nèant	NON	GE Negatif	Negatif		OUI	10 J	IgG + IgM	Negatif
E084	CME	Haut Bassins	24	F	BOBO SECT	OUI	non	non	OUI	OUI	OUI	NON	OUI	NON	NON	NON	NON	Nèant	NON	GE POSITIF	Positif		OUI		Negatif	Negatif
E085	CME	Haut Bassins	43	M	BOBO SECT	OUI	OUI	non	OUI	NON	OUI	NON	OUI	NON	NON	NON	NON	Nèant	NON	GE POSITIF	Positif		OUI		Negatif	Negatif
E086	CME	Haut Bassins	20	M	BOBO SECT	non	OUI	oui	OUI	OUI	Non	NON	OUI	NON	NON	NON	NON	Nèant	NON	GE Negatif	Negatif		OUI		Negatif	Negatif
E087	CME	Haut Bassins	49	f	BOBO SET25	OUI	non	non	OUI	OUI	OUI	NON	OUI	NON	NON	NON	NON	Nèant	NON	GE Negatif	Negatif		OUI		Negatif	Negatif
E088	CME	Haut Bassins	50	M	BOBO SECT	OUI	non	non	non	OUI	OUI	OUI	OUI	NON	NON	NON	NON	Nèant	NON	GE Negatif	Negatif		OUI		Negatif	Negatif
E089	CME	Haut Bassins	42	M	BOBO SECT	OUI	OUI	non	OUI	NON	OUI	NON	OUI	NON	NON	NON	NON	Nèant	NON	GE Negatif	Negatif		OUI		Negatif	Negatif
E090	CME	Haut Bassins	19	M	BOBO SECT	OUI	OUI	non	OUI	OUI	OUI	NON	OUI	NON	NON	NON	NON	Nèant	NON	GE Positif	Positif		OUI	9 J	IgM	Negatif
E091	CME	Haut Bassins	26	M	BOBO SECT	OUI	OUI	non	OUI	OUI	OUI	NON	OUI	NON	NON	NON	NON	Nèant	NON	GE Positif	Positif		OUI		Negatif	Negatif
E092	CME	Haut Bassins	48	M	BOBO SECT	OUI	OUI	non	non	NON	Non	NON	OUI	NON	NON	NON	NON	Nèant	NON	GE Negatif	Negatif		OUI		Negatif	Negatif
E093	CME	Haut Bassins	28	M	BOBO SECT	non	OUI	non	OUI	OUI	OUI	NON	OUI	NON	NON	NON	NON	Nèant	NON	GE Negatif	Negatif		OUI		Negatif	Negatif
E094	CME	Haut Bassins	32	M	BOBO SECT	OUI	OUI	oui	OUI	OUI	Non	NON	OUI	NON	NON	NON	NON	Nèant	NON	GE Positif	Positif		OUI	8 J	IgM	Negatif
E095	CME	Haut Bassins	61	M	BOBO SECT	OUI	OUI	non	OUI	OUI	OUI	NON	OUI	NON	NON	NON	NON	Nèant	NON	GE Positif	Positif		OUI	8 J	IgM	Negatif
E096	CME	Haut Bassins	48	M	BOBO SECT	OUI	OUI	non	OUI	OUI	Non	NON	OUI	NON	NON	NON	NON	Nèant	NON	GE POSITIF	Positif		OUI	10 J	IgM	Negatif
E097	CME	Haut Bassins	61	M	BOBO SECT	OUI	OUI	non	non	NON	OUI	OUI	OUI	NON	NON	NON	NON	Nèant	NON	GE POSITIF	Positif		OUI		Negatif	Negatif
E098	CME	Haut Bassins	30	M	BOBO SECT	OUI	non	non	OUI	OUI	OUI	NON	OUI	NON	NON	NON	NON	Nèant	NON	GE POSITIF	Positif		OUI		Negatif	Negatif
E099	CME	Haut Bassins	18	F	BOBO SECT	OUI	OUI	non	OUI	OUI	Non	NON	OUI	NON	NON	NON	NON	Nèant	NON	GE POSITIF	Positif		OUI		Negatif	Negatif
E100	CME	Haut Bassins	38	F	BOBO SECT	non	OUI	non	OUI	OUI	OUI	NON	OUI	NON	NON	NON	NON	Nèant	NON	positif	Positif		OUI		NS1	Positif		DENV3
E101	CME	Haut Bassins	66	F	BOBO SECT	OUI	OUI	non	non	NON	OUI	NON	OUI	NON	NON	NON	NON	Nèant	NON	GE POSITIF	Positif		OUI	4 J	NS1 + IgM	Positif		DENV3
E102	CME	Haut Bassins	17	M	BOBO SECT	OUI	non	non	non	OUI	Non	NON	OUI	NON	NON	NON	NON	Nèant	NON	GE POSITIF	Positif		OUI	9 J	IgM	Negatif
E103	CME	Haut Bassins	70	M	BOBO SECT	OUI	OUI	oui	OUI	OUI	OUI	NON	OUI	NON	NON	NON	NON	Nèant	NON	GE POSITIF	Positif		OUI	11 J	IgM	Negatif
E104	CME	Haut Bassins	57	F	BOBO SECT	non	non	non	OUI	OUI	OUI	NON	OUI	NON	NON	NON	NON	Nèant	NON	GE Negatif	Negatif		OUI		Negatif	Negatif
E105	CME	Haut Bassins	47	F	BOBO SECT	OUI	OUI	non	OUI	OUI	Non	NON	OUI	NON	NON	NON	NON	Nèant	NON	GE POSITIF	Positif		OUI		IgM	Negatif
E106	CME	Haut Bassins	31	M	BOBO SECT	OUI	non	oui	non	NON	OUI	OUI	OUI	NON	NON	NON	NON	Nèant	NON	GE POSITIF	Positif		OUI	10 J	IgM	Negatif
E107	CME	Haut Bassins	47	M	BOBO SECT	OUI	OUI	non	OUI	OUI	Non	NON	OUI	NON	NON	NON	NON	Nèant	NON	GE POSITIF	Positif		OUI	6 J	NS1	Positif		DENV3
E108	CME	Haut Bassins	27	M	BOBO SECT	OUI	OUI	non	OUI	OUI	OUI	NON	OUI	NON	NON	NON	NON	Nèant	NON	GE Negatif	Negatif		OUI		Negatif	Negatif
E109	CME	Haut Bassins	16	M	BOBO SECT	OUI	OUI	non	OUI	OUI	OUI	NON	OUI	NON	NON	NON	NON	Nèant	NON	GE POSITIF	Positif		OUI	10 J	IgG	Negatif
E110	CME	Haut Bassins	25	F	BOBO SECT	OUI	OUI	non	OUI	NON	OUI	NON	OUI	NON	NON	NON	NON	Nèant	NON	GE Negatif	Negatif		OUI		Negatif	Negatif
E111	CME	Haut Bassins	28	M	BOBO SECT	OUI	non	non	OUI	OUI	Non	NON	OUI	NON	NON	NON	NON	NON	NON	GE (positif)	Positif)		OUI	10 J	IgM	Negatif
E112	CME	Haut Bassins	32	M	BOBO SECT	OUI	OUI	non	Non	OUI	OUI	NON	OUI	NON	NON	NON	NON	NON	NON	GE (positif)	Positif)		OUI		negatif	Negatif
E113	CME	Haut Bassins	61	M	BOBO SECT	OUI	OUI	non	OUI	OUI	Non	NON	OUI	NON	NON	NON	NON	NON	NON	GE (positif)	Positif)		OUI	11 J	IgG	Negatif
E114	CME	Haut Bassins	48	M	BOBO SECT	OUI	non	non	non	OUI	OUI	NON	OUI	NON	NON	NON	NON	NON	NON	GE (positif)	Positif)		OUI	11 J	IgG	Negatif
E115	CME	Haut Bassins	30	F	BOBO SECT	OUI	OUI	oui	OUI	OUI	OUI	NON	OUI	NON	NON	NON	NON	NON	NON	GE (positif)	Positif)		OUI		Negatif	Negatif
E116	CME	Haut Bassins	18	M	BOBO SECT	OUI	OUI	non	OUI	OUI	OUI	NON	OUI	NON	NON	NON	NON	NON	NON	GE (positif)	Positif)		OUI		Negatif	Negatif
E117	CME	Haut Bassins	38	M	BOBO SECT	OUI	OUI	non	non	OUI	Non	NON	OUI	NON	NON	NON	NON	NON	NON	Negatif	Negatif		OUI		negatif	Negatif
E118	CME	Haut Bassins	66	F	BOBO SECT	OUI	OUI	non	OUI	OUI	OUI	NON	OUI	NON	NON	NON	NON	NON	NON	GE Positif	Positif		OUI		NEGATIF	Negatif
E119	CME	Haut Bassins	17	F	BOBO SECT	OUI	OUI	non	OUI	OUI	Non	NON	OUI	NON	NON	NON	NON	NON	NON	Negatif	Negatif		OUI		NEGATIF	Negatif
E120	CME	Haut Bassins	47	F	BOBO SECT	OUI	OUI	non	OUI	OUI	OUI	NON	OUI	NON	NON	NON	NON	NON	NON	GE positif	Positif		OUI	10 J	IgG	Negatif
E121	CME	Haut Bassins	31	F	BOBO SECT	OUI	OUI	non	OUI	OUI	OUI	NON	OUI	NON	NON	NON	NON	NON	NON	NEGATIF	Negatif		OUI		NEAGTIF	Negatif
E122	CME	Haut Bassins	47	F	BOBO SECT	OUI	non	oui	non	OUI	OUI	NON	OUI	NON	NON	NON	NON	NON	NON	NEGATIF	Negatif		OUI		NEAGTIF	Negatif
E123	CME	Haut Bassins	27	M	BOBO SECT	OUI	OUI	non	non	OUI	Non	NON	OUI	NON	NON	NON	NON	NON	NON	negatif	Negatif		OUI	10 J	IgG +IgM	Negatif
E124	CME	Haut Bassins	16	F	BOBO SECT	OUI	non	non	OUI	OUI	OUI	NON	OUI	NON	NON	NON	NON	NON	NON	positif	Positif		OUI		negatif	Negatif
E125	CME	Haut Bassins	25	M	BOBO SECT	OUI	non	non	OUI	OUI	Non	NON	OUI	NON	NON	NON	NON	NON	NON	GE positif	Positif				NEGATIF	Negatif
E126	CME	Haut Bassins	32	F	BOBO SECT	OUI	OUI	non	OUI	OUI	OUI	NON	OUI	NON	NON	NON	NON	NON	NON	GE positif	Positif				NEGATIF	Negatif
E127	CME	Haut Bassins	37	F	BOBO SECT	OUI	non	non	OUI	OUI	OUI	NON	OUI	NON	NON	NON	NON	NON	NON	GE positif	Positif			11 J	IgG	Negatif
E128	CME	Haut Bassins	53	F	BOBO SECT	OUI	OUI	oui	OUI	OUI	OUI	NON	OUI	NON	NON	NON	NON	NON	NON	GE NEGATIF	Negatif				NEGATIF	Negatif
E129	CME	Haut Bassins	58	F	BOBO SECT	OUI	OUI	non	OUI	OUI	Non	NON	OUI	NON	NON	NON	NON	NON	NON	GE positif	Positif				NEGATIF	Negatif
E130	CME	Haut Bassins	28	F	BOBO SECT	OUI	OUI	non	OUI	OUI	OUI	NON	OUI	NON	NON	NON	NON	NON	NON	GE Positif	Positif				NEGATIF	Negatif
E131	CME	Haut Bassins	45	M	BOBO SECT	OUI	non	non	OUI	OUI	Non	NON	OUI	NON	NON	NON	NON	NON	NON	NEGATIF	Negatif				NEGATIF	Negatif
E132	CME	Haut Bassins	18	M	BOBO SECT	OUI	non	non	OUI	OUI	OUI	NON	OUI	NON	NON	NON	NON	NON	NON	GE positif	Positif				NEGATIF	Negatif
E133	CME	Haut Bassins	48	F	BOBO SECT	OUI	OUI	non	OUI	OUI	OUI	NON	OUI	NON	NON	NON	NON	NON	NON	GE positif	Positif				NEGATIF	Negatif
E134	CME	Haut Bassins	35	F	BOBO SECT	OUI	non	non	OUI	OUI	OUI	NON	OUI	NON	NON	NON	NON	NON	NON	GE positif	Positif			10 J	IgG	Negatif
E135	CME	Haut Bassins	23	M	BOBO SECT	OUI	OUI	non	OUI	OUI	OUI	NON	OUI	NON	NON	NON	NON	NON	NON	GE negatif	Negatif			9 J	IgM +IgG	Negatif
E136	CME	Haut Bassins	31	M	BOBO SECT	OUI	OUI	non	OUI	OUI	Non	NON	OUI	NON	NON	NON	NON	NON	NON	GE negatif	Positif			5 J	NS1	Positif		DENV3
E137	CME	Haut Bassins	42	F	BOBO SECT	OUI	non	oui	OUI	OUI	OUI	NON	OUI	NON	NON	NON	NON	NON	NON	GE positif	Positif				Negatif	Negatif
E138	CME	Haut Bassins	37	F	BOBO SECT	OUI	OUI	non	OUI	OUI	OUI	NON	OUI	NON	NON	NON	NON	NON	NON	GE positif	Positif			7 J	NS1+IgM	Positif		DENV3
E139	CME	Haut Bassins	38	M	BOBO SECT	OUI	non	non	OUI	OUI	Non	NON	OUI	NON	NON	NON	NON	NON	NON	GE negatif	Negatif			10 J	IgG	Negatif
E140	CME	Haut Bassins	66	M	BOBO SECT	OUI	OUI	oui	OUI	OUI	OUI	NON	OUI	NON	NON	NON	NON	NON	NON	GE positif	Positif				NEGATIF	Negatif
E141	CME	Haut Bassins	17	M	BOBO SECT	OUI	OUI	non	OUI	OUI	OUI	NON	OUI	NON	NON	NON	NON	NON	NON	POSITIF	Positif			9 J	IgM	Negatif
E142	CME	Haut Bassins	47	F	BOBO SECT	OUI	non	non	OUI	OUI	Non	NON	OUI	NON	NON	NON	NON	NON	NON	NEGATIF	Negatif			10 J	IgM	Negatif
E143	CME	Haut Bassins	31	M	BOBO SECT	OUI	OUI	non	non	OUI	OUI	NON	OUI	NON	NON	NON	NON	NON	NON	NEGATIF	Negatif			11 J	IgG+ IgM	Negatif
E144	CME	Haut Bassins	47	M	BOBO SECT	OUI	non	non	OUI	OUI	OUI	NON	OUI	NON	NON	NON	NON	NON	NON	GE positif	Positif				NEGATIF	Negatif
E145	CME	Haut Bassins	27	F	BOBO SECT	OUI	OUI	non	non	OUI	OUI	NON	OUI	NON	NON	NON	NON	NON	NON	GE POSITIF	Positif			9 J	IgM	Negatif
E146	CME	Haut Bassins	16	F	BOBO SECT	OUI	OUI	non	OUI	OUI	OUI	NON	OUI	NON	NON	NON	NON	NON	NON	GE Positif	Positif				NEGATIF	Negatif
E147	CME	Haut Bassins	25	M	BOBO SECT	OUI	OUI	oui	non	OUI	OUI	NON	OUI	NON	NON	NON	NON	NON	NON	GE POSITIF	Positif			10 J	IgG+ IgM	Negatif
E148	CME	Haut Bassins	22	M	BOBO SECT	OUI	non	non	OUI	OUI	OUI	NON	OUI	NON	NON	NON	NON	NON	NON	GE positif	Positif			9 J	IgG+IgM	Negatif
E149	CME	Haut Bassins	24	F	BOBO SECT	OUI	OUI	non	OUI	OUI	OUI	NON	OUI	NON	NON	NON	NON	NON	NON	GE positif	Positif			9 J	IgG+IgM	Negatif
E150	CME	Haut Bassins	43	F	BOBO SECT	OUI	non	oui	OUI	OUI	Non	NON	OUI	NON	NON	NON	NON	NON	NON	GE positif	Positif				NEGATIF	Negatif
E151	CME	Haut Bassins	24	F	BOBO SECT	non	OUI	non	non	OUI	OUI	NON	OUI	NON	NON	NON	NON	NON	NON	GE Negatif	Negatif			9 J	IgG+ IgM	Negatif
E152	CME	Haut Bassins	33	M	BOBO SECT	OUI	non	non	OUI	OUI	Non	NON	OUI	NON	NON	NON	NON	NON	NON	GE positif	Positif				NEGATIF	Negatif
E153	CME	Haut Bassins	21	F	BOBO SECT	OUI	non	non	OUI	OUI	OUI	NON	OUI	NON	NON	NON	NON	NON	NON	GE positif	Positif			10 J	IgM	Negatif
E154	CME	Haut Bassins	42	M	BOBO SECT	OUI	OUI	non	OUI	OUI	Non	NON	OUI	NON	NON	NON	NON	NON	NON	GE positif	Positif				NEGATIF	Negatif
E155	CME	Haut Bassins	48	F	BOBO SECT	non	OUI	non	non	OUI	OUI	NON	OUI	NON	NON	NON	NON	NON	NON	GE positif	Positif			11 J	IgG+IgM	Negatif
E156	CME	Haut Bassins	28	F	BOBO SECT	OUI	OUI	oui	OUI	OUI	OUI	NON	OUI	NON	NON	NON	NON	NON	NON	GE positif	Positif			8 J	IgM	Negatif
E157	CME	Haut Bassins	18	F	BOBO SECT	OUI	OUI	non	OUI	OUI	OUI	NON	OUI	NON	NON	NON	NON	NON	NON	GE negatif	Negatif				NEGATIF	Negatif
E158	CME	Haut Bassins	48	M	BOBO SECT	OUI	OUI	non	OUI	OUI	OUI	NON	OUI	NON	NON	NON	NON	NON	NON	GE positif	Positif			9 J	IgG+IgM	Negatif
E159	CME	Haut Bassins	35	M	BOBO SECT	OUI	OUI	non	non	OUI	Non	NON	OUI	NON	NON	NON	NON	NON	NON	GE positif	Positif				negatif	Negatif
E160	CME	Haut Bassins	23	M	BOBO SECT	OUI	OUI	non	OUI	OUI	OUI	NON	OUI	NON	NON	NON	NON	NON	NON	GE Negatif	Negatif			11 J	IgG	Negatif
E161	CME	Haut Bassins	31	F	BOBO SECT	OUI	OUI	non	Non	OUI	OUI	NON	OUI	NON	NON	NON	NON	NON	NON	GE positif	Positif			11 J	IgG+IgM	Negatif
E162	CME	Haut Bassins	42	M	BOBO SECT	OUI	OUI	non	OUI	OUI	Non	NON	OUI	NON	NON	NON	NON	NON	NON	Negatif	Positif			4 J	NS1	Positif		DENV3
E163	CME	Haut Bassins	37	M	BOBO SECT	OUI	OUI	non	OUI	OUI	OUI	NON	OUI	NON	NON	NON	NON	NON	NON	GE positif	Positif			3 J	NS1	Positif		DENV1
E164	CME	Haut Bassins	12	F	BOBO SECT	OUI	OUI	non	OUI	OUI	Non	NON	OUI	NON	NON	NON	NON	NON	NON	GE positif	Positif				negatif	Negatif
E165	CME	Haut Bassins	13	F	BOBO SECT	OUI	OUI	oui	non	OUI	OUI	NON	OUI	NON	NON	NON	NON	NON	NON	GE NEGATIF	Negatif			11 J	IgG	Negatif
E166	CME	Haut Bassins	62	F	BOBO SECT	OUI	OUI	non	OUI	non	OUI	NON	OUI	NON	NON	NON	NON	NON	NON	GE positif	Positif				NEGATIF	Negatif
E167	CME	Haut Bassins	35	F	BOBO SECT	OUI	OUI	non	non	OUI	Non	NON	OUI	NON	NON	NON	NON	NON	NON	GE NEGATIF	Negatif				NEGATIF	Negatif
E168	CME	Haut Bassins	29	M	BOBO SECT	OUI	OUI	non	OUI	OUI	OUI	NON	OUI	NON	NON	NON	NON	NON	NON	GE positif	Positif				NEGATIF	Negatif
E169	CME	Haut Bassins	46	F	BOBO SECT	OUI	OUI	oui	OUI	non	Non	NON	OUI	NON	NON	NON	NON	NON	NON	GE positif	Positif				NEGATIF	Negatif
E170	CME	Haut Bassins	28	F	BOBO SECT	OUI	OUI	non	OUI	OUI	OUI	NON	OUI	NON	NON	NON	NON	NON	NON	GE positif	Positif			10 J	IgG	Negatif
E171	CME	Haut Bassins	31	F	BOBO SECT	OUI	OUI	non	OUI	OUI	OUI	NON	OUI	NON	NON	NON	NON	NON	NON	GE positif	Positif				NEGATIF	Negatif
E172	CME	Haut Bassins	60	F	BOBO SECT	OUI	OUI	non	OUI	OUI	OUI	NON	OUI	NON	NON	NON	NON	NON	NON	GE positif	Positif			10 J	IgM	Negatif
E173	CME	Haut Bassins	47	F	BOBO SECT	OUI	OUI	non	OUI	OUI	OUI	NON	OUI	NON	NON	NON	NON	NON	NON	GE NEGATIF	Negatif			7 J	NS1+IgM	Positif		DENV3
E174	CME	Haut Bassins	36	F	BOBO SECT	OUI	OUI	oui	non	non	Non	NON	OUI	NON	NON	NON	NON	NON	NON	GE positif	Positif			9 J	IgM	Negatif
E175	CME	Haut Bassins	24	M	BOBO SECT	OUI	OUI	non	OUI	OUI	OUI	NON	OUI	NON	NON	NON	NON	NON	NON	GE positif	Positif			10 J	IgG	Negatif
E176	CME	Haut Bassins	24	F	BOBO SECT	non	OUI	non	OUI	OUI	OUI	NON	OUI	NON	NON	NON	NON	NON	NON	GE positif	Positif				NEGATIF	Negatif
E177	CME	Haut Bassins	6	F	BOBO SECT	OUI	OUI	non	OUI	non	OUI	NON	OUI	NON	NON	NON	NON	NON	NON	GE positif	Positif				NEGATIF	Negatif
E178	CME	Haut Bassins	27	F	BOBO SECT	OUI	OUI	non	OUI	OUI	OUI	NON	OUI	NON	NON	NON	NON	NON	NON	GE positif	Positif			10 J	IgM	Negatif
E179	CME	Haut Bassins	34	M	BOBO SECT	OUI	OUI	non	non	OUI	Non	NON	OUI	NON	NON	NON	NON	NON	NON	GE positif	Positif				NEGATIF	Negatif
E180	CME	Haut Bassins	18	F	BOBO SECT	non	OUI	non	OUI	non	OUI	NON	OUI	NON	NON	NON	NON	NON	NON	GE negatif	Negatif				NEGATIF	Negatif
E181	CME	Haut Bassins	43	F	BOBO SECT	OUI	OUI	oui	OUI	OUI	OUI	NON	OUI	NON	NON	NON	NON	NON	NON	GE positif	Positif			5 J	NS1	Positif		DENV3
E182	CME	Haut Bassins	27	M	BOBO SECT	OUI	OUI	non	OUI	OUI	OUI	NON	OUI	NON	NON	NON	NON	NON	NON	GE positif	Positif				NEGATIF	Negatif
E183	CME	Haut Bassins	55	M	BOBO SECT	non	OUI	non	non	non	Non	NON	OUI	NON	NON	NON	NON	NON	NON	GE positif	Positif				NEGATIF	Negatif
E184	CME	Haut Bassins	21	F	BOBO SECT	OUI	non	non	OUI	OUI	OUI	NON	OUI	NON	NON	NON	NON	NON	NON	GE positif	Positif				NEGATIF	Negatif
E185	CME	Haut Bassins	40	M	BOBO SECT	OUI	OUI	non	non	non	OUI	NON	OUI	NON	NON	NON	NON	NON	NON	GE positif	Positif				NEGATIF	Negatif
E186	CME	Haut Bassins	6	M	BOBO SECT	OUI	OUI	oui	OUI	OUI	Non	NON	OUI	NON	NON	NON	NON	NON	NON	GE negatif	Negatif				NEGATIF	Negatif
E187	CME	Haut Bassins	17	F	BOBO SECT	OUI	OUI	non	OUI	OUI	OUI	NON	OUI	NON	NON	NON	NON	NON	NON	GE positif	Positif			5 J	NS1	Positif		DENV3
E188	CME	Haut Bassins	32	F	BOBO SECT	OUI	OUI	non	OUI	non	OUI	NON	OUI	NON	NON	NON	NON	NON	NON	NEGATIF	Negatif				NEGATIF	Negatif
E189	CME	Haut Bassins	24	M	BOBO SECT	OUI	non	non	non	OUI	Non	NON	OUI	NON	NON	NON	NON	NON	NON	POSITIF	Positif				NEGATIF	Negatif
E190	CME	Haut Bassins	43	M	BOBO SECT	OUI	OUI	non	non	non	OUI	NON	OUI	NON	NON	NON	NON	NON	NON	NEGATIF	Negatif				NEGATIF	Negatif
E191	CME	Haut Bassins	24	F	BOBO SECT	OUI	OUI	non	non	OUI	OUI	NON	OUI	NON	NON	NON	NON	NON	NON	POSITIF	Positif			7 J	NS1+IgM	Positif		DENV3
E192	CME	Haut Bassins	33	F	BOBO SECT	OUI	OUI	oui	non	OUI	Non	NON	OUI	NON	NON	NON	NON	NON	NON	POSITIF	Positif				NEGATIF	Negatif
E193	CME	Haut Bassins	21	M	BOBO SECT	OUI	OUI	non	non	OUI	OUI	NON	OUI	NON	NON	NON	NON	NON	NON	POSITIF	Positif			7 J	NS1+IgM	Positif		DENV3
E194	CME	Haut Bassins	42	F	BOBO SECT	OUI	OUI	oui	non	OUI	OUI	NON	OUI	NON	NON	NON	NON	NON	NON	POSITIF	Positif				NEGATIF	Negatif
E195	CME	Haut Bassins	48	M	BOBO SECT	OUI	OUI	non	OUI	OUI	Non	NON	OUI	NON	NON	NON	NON	NON	NON	GE positif	Positif			11 J	IgG+IgM	Negatif
E196	CME	Haut Bassins	28	M	BOBO SECT	OUI	OUI	non	OUI	non	OUI	NON	OUI	NON	NON	NON	NON	NON	NON	GE positif	Positif			10 J	IgG+IgM	Negatif
E197	CME	Haut Bassins	32	M	BOBO SECT	OUI	OUI	non	OUI	OUI	Non	NON	OUI	NON	NON	NON	NON	NON	NON	NEGATIF	positif				NEGATIF	Negatif
E198	CME	Haut Bassins	61	M	BOBO SECT	OUI	OUI	non	non	OUI	OUI	NON	OUI	NON	NON	NON	NON	NON	NON	NEGATIF	Negatif			9 J	IgM	Negatif
E199	CME	Haut Bassins	28	M	BOBO SECT	OUI	OUI	non	OUI	OUI	OUI	NON	OUI	NON	NON	NON	NON	NON	NON	GE positif	Positif			11 J	IgG	Negatif
E200	CME	Haut Bassins	2	M	BOBO SECT	OUI	non	non	OUI	non	OUI	NON	OUI	NON	NON	NON	NON	NON	NON	NEGATIF	Negatif			11 J	IgG+IgM	Negatif
E201	CME	Haut Bassins	18	M	BOBO SECT	OUI	OUI	oui	OUI	OUI	OUI	NON	OUI	NON	NON	NON	NON	NON	NON	NEGATIF	Negatif				NEGATIF	Negatif
E202	CME	Haut Bassins	24	M	BOBO SECT	OUI	OUI	non	OUI	OUI	OUI	NON	OUI	NON	NON	NON	NON	NON	NON	GE positif	Positif			10 J	IgG+IgM	Negatif
E203	CME	Haut Bassins	34	M	BOBO SECT	OUI	OUI	non	OUI	non	OUI	NON	OUI	NON	NON	NON	NON	NON	NON	NEGATIF	Negatif			10 J	IgG+IgM	Negatif
E204	CME	Haut Bassins	45	M	BOBO SECT	OUI	OUI	non	OUI	OUI	Non	NON	OUI	NON	NON	NON	NON	NON	NON	NEGATIF	Negatif			11 J	IgG	Negatif
E205	CME	Haut Bassins	18	M	BOBO SECT	OUI	OUI	non	non	OUI	OUI	NON	OUI	NON	NON	NON	NON	NON	NON	GE positif	Positif				NEGATIF	Negatif
E206	CME	Haut Bassins	48	F	BOBO SECT	OUI	OUI	non	OUI	OUI	Non	NON	OUI	NON	NON	NON	NON	NON	NON	NEGATIF	Negatif			11 J	IgG+IgM	Negatif
E207	CME	Haut Bassins	35	F	BOBO SECT	non	OUI	oui	non	non	OUI	NON	OUI	NON	NON	NON	NON	NON	NON	NEGATIF	Negatif			8 J	IgM	Negatif
E208	CME	Haut Bassins	23	F	BOBO SECT	OUI	OUI	non	OUI	OUI	Non	NON	OUI	NON	NON	NON	NON	NON	NON	GE positif	Positif				NEGATIF	Negatif
E209	CME	Haut Bassins	31	F	BOBO SECT	OUI	OUI	non	OUI	OUI	OUI	NON	OUI	NON	NON	NON	NON	NON	NON	GE positif	Positif			10 J	IgG+IgM	Negatif
E210	CME	Haut Bassins	42	M	BOBO SECT	OUI	OUI	non	non	non	OUI	NON	OUI	NON	NON	NON	NON	NON	NON	GE positif	Positif			10 J	IgM	Negatif
E211	CME	Haut Bassins	34	F	BOBO SECT	OUI	OUI	oui	OUI	OUI	Non	NON	OUI	NON	NON	NON	NON	NON	NON	GE positif	Positif			11 J	IgG	Negatif
E212	CME	Haut Bassins	12	M	BOBO SECT	OUI	OUI	non	OUI	OUI	OUI	NON	OUI	NON	NON	NON	NON	NON	NON	GE positif	Positif				NEGATIF	Negatif
E213	CME	Haut Bassins	13	F	BOBO SECT	OUI	OUI	non	non	non	OUI	NON	OUI	NON	NON	NON	NON	NON	NON	GE NEGATIF	Negatif				NEGATIF	Negatif
E214	CME	Haut Bassins	62	M	BOBO SECT	OUI	OUI	non	OUI	OUI	OUI	NON	OUI	NON	NON	NON	NON	NON	NON	GE positif	Positif				NEGATIF	Negatif
E215	CME	Haut Bassins	35	M	BOBO SECT	OUI	OUI	non	OUI	OUI	Non	NON	OUI	NON	NON	NON	NON	NON	NON	GE positif	Positif			11 J	IgG	Negatif
E216	CME	Haut Bassins	29	M	BOBO SECT	OUI	OUI	non	OUI	OUI	OUI	NON	OUI	NON	NON	NON	NON	NON	NON	GE positif	Positif			6 J	NS1+IgG	Positif		DENV3
E217	CME	Haut Bassins	46	F	BOBO SECT	OUI	OUI	non	OUI	OUI	OUI	NON	OUI	NON	NON	NON	NON	NON	NON	GE positif	Positif				NEGATIF	Negatif
E218	CME	Haut Bassins	28	M	BOBO SECT	OUI	OUI	non	OUI	OUI	Non	NON	OUI	NON	NON	NON	NON	NON	NON	NEGATIF	Positif			4 J	NS1	Positif		DENV1
E219	CME	Haut Bassins	31	F	BOBO SECT	OUI	OUI	non	OUI	OUI	OUI	NON	OUI	NON	NON	NON	NON	NON	NON	GE positif	Positif			10 J	IgG	Negatif
E220	CME	Haut Bassins	60	M	BOBO SECT	OUI	OUI	non	non	OUI	Non	NON	OUI	NON	NON	NON	NON	NON	NON	GE positif	Positif			11 J	IgG	Negatif
E221	CME	Haut Bassins	47	M	BOBO SECT	OUI	OUI	non	non	non	OUI	NON	OUI	NON	NON	NON	NON	NON	NON	NEGATIF	Negatif			5 J	NEGATIF	Negatif
E222	CME	Haut Bassins	36	F	BOBO SECT	OUI	OUI	non	non	OUI	Non	NON	OUI	NON	NON	NON	NON	NON	NON	GE positif	Positif			10 J	IgG+IgM	Negatif
E223	CME	Haut Bassins	24	M	BOBO SECT	OUI	OUI	non	non	non	OUI	NON	OUI	NON	NON	NON	NON	NON	NON	GE positif	Positif			11 J	IgG	Negatif
E224	CME	Haut Bassins	24	M	BOBO SECT	OUI	OUI	non	non	OUI	Non	NON	OUI	NON	NON	NON	NON	NON	NON	NEGATIF	Negatif			8 J	IgM	Negatif
E225	CME	Haut Bassins	6	M	BOBO SECT	OUI	OUI	oui	OUI	OUI	Non	NON	OUI	NON	NON	NON	NON	NON	NON	NEGATIF	Negatif			8 J	IgM	Negatif
E226	CME	Haut Bassins	27	F	BOBO SECT	OUI	OUI	non	non	non	Non	NON	OUI	NON	NON	NON	NON	NON	NON	NEGATIF	Negatif			9 J	IgM+IgG	Negatif
E227	CME	Haut Bassins	19	F	BOBO SECT	OUI	OUI	non	OUI	OUI	Non	NON	OUI	NON	NON	NON	NON	NON	NON	GE Positif	Positif			10 J	IgM	Negatif
E228	CME	Haut Bassins	18	F	BOBO SECT	OUI	OUI	non	OUI	non	Non	NON	OUI	NON	NON	NON	NON	NON	NON	NEGATIF	Negatif			9 J	IgM	Negatif
E229	CME	Haut Bassins	33	F	BOBO SECT	OUI	OUI	oui	OUI	OUI	Non	NON	OUI	NON	NON	NON	NON	NON	NON	NEGATIF	Negatif			10 J	NEGATIF	Negatif
E230	CME	Haut Bassins	21	F	BOBO SECT	OUI	OUI	non	OUI	non	Non	NON	OUI	NON	NON	NON	NON	NON	NON	GE positif	Positif			11 J	IgG	Negatif
E231	CME	Haut Bassins	55	F	BOBO SECT	OUI	OUI	non	OUI	OUI	OUI	NON	OUI	NON	NON	NON	NON	NON	NON	GE positif	Positif			11 J	IgM	Negatif
E232	CME	Haut Bassins	21	F	BOBO SECT	non	OUI	non	OUI	non	OUI	NON	OUI	NON	NON	NON	NON	NON	NON	NEGATIF	Negatif			10 J	IgG	Negatif
E233	CME	Haut Bassins	40	F	BOBO SECT	OUI	OUI	non	non	OUI	OUI	NON	OUI	NON	NON	NON	NON	NON	NON	NEGATIF	Negatif				NEGATIF	Negatif
E234	CME	Haut Bassins	6	M	BOBO SECT	OUI	OUI	non	OUI	OUI	Non	NON	OUI	NON	NON	NON	NON	NON	NON	POSITIF	Positif			10 J	IgG+IgM	Negatif
E235	CME	Haut Bassins	33	F	BOBO SECT	OUI	OUI	non	OUI	non	OUI	NON	OUI	NON	NON	NON	NON	NON	NON	POSITIF	Positif			11 J	IgG	Negatif
E236	CME	Haut Bassins	22	F	BOBO SECT	OUI	OUI	non	OUI	OUI	Non	NON	OUI	NON	NON	NON	NON	NON	NON	NEGATIF	Negatif			11 J	NEGATIF	Negatif
E237	CME	Haut Bassins	32	M	BOBO SECT	OUI	OUI	non	OUI	non	OUI	NON	OUI	NON	NON	NON	NON	NON	NON	POSITIF	Positif			10 J	IgG	Negatif
E238	CME	Haut Bassins	43	F	BOBO SECT	OUI	OUI	non	OUI	OUI	OUI	NON	OUI	NON	NON	NON	NON	NON	NON	GE positif	Positif				NEGATIF	Negatif
E239	CME	Haut Bassins	44	F	BOBO SECT	non	OUI	non	non	non	OUI	NON	OUI	NON	NON	NON	NON	NON	NON	NEGATIF	Negatif				NEGATIF	Negatif
E240	CME	Haut Bassins	57	M	BOBO SECT	OUI	non	non	non	OUI	Non	NON	OUI	NON	NON	NON	NON	NON	NON	GE positif	Positif				NEGATIF	Negatif
E241	CME	Haut Bassins	32	M	BOBO SECT	OUI	OUI	non	non	non	Non	NON	OUI	NON	NON	NON	NON	NON	NON	NEGATIF	Negatif			11 J	IgG	Negatif
E242	CME	Haut Bassins	41	M	BOBO SECT	OUI	non	non	non	OUI	Non	NON	OUI	NON	NON	NON	NON	NON	NON	GE positif	Positif				NEGATIF	Negatif
E243	CME	Haut Bassins	48	F	BOBO SECT	OUI	OUI	oui	non	non	Non	NON	OUI	NON	NON	NON	NON	NON	NON	GE positif	Positif				NEGATIF	Negatif
E244	CME	Haut Bassins	28	F	BOBO SECT	OUI	OUI	non	non	OUI	OUI	NON	OUI	NON	NON	NON	NON	NON	NON	GE positif	Positif			10 J	IgG	Negatif
E245	CME	Haut Bassins	32	M	BOBO SECT	OUI	OUI	non	non	non	OUI	NON	Non	NON	NON	NON	NON	NON	NON	GE positif	Positif				NEGATIF	Negatif
E246	CME	Haut Bassins	61	F	BOBO SECT	OUI	OUI	non	non	OUI	OUI	NON	OUI	NON	NON	NON	NON	NON	NON	NEGATIF	Negatif			11 J	IgG	Negatif
E247	CME	Haut Bassins	33	M	BOBO SECT	OUI	OUI	oui	OUI	OUI	Non	NON	OUI	NON	NON	NON	NON	NON	NON	GE positif	Positif				IgG+IgM	Negatif
E248	CME	Haut Bassins	30	M	BOBO SECT	OUI	OUI	non	OUI	non	OUI	NON	OUI	NON	NON	NON	NON	NON	NON	GE positif	Positif				NEGATIF	Negatif
E249	CME	Haut Bassins	18	M	BOBO SECT	OUI	non	non	non	OUI	OUI	NON	Non	NON	NON	NON	NON	NON	NON	GE positif	Positif				NEGATIF	Negatif
E250	CME	Haut Bassins	38	F	BOBO SECT	non	OUI	non	OUI	non	OUI	NON	Non	NON	NON	NON	NON	NON	NON	NEGATIF	Negatif			11 J	IgG	Negatif
E251	CME	Haut Bassins	66	M	BOBO SECT	OUI	OUI	non	OUI	OUI	OUI	NON	OUI	NON	NON	NON	NON	NON	NON	GE positif	Positif				Negatif	Negatif
E252	CME	Haut Bassins	17	F	BOBO SECT	OUI	OUI	non	OUI	non	Non	NON	OUI	NON	NON	NON	NON	NON	NON	NEGATIF	Negatif			7 J	NEGATIF	Negatif
E253	CME	Haut Bassins	47	M	BOBO SECT	OUI	OUI	non	OUI	OUI	OUI	NON	OUI	NON	NON	NON	NON	NON	NON	GE positif	Positif			9 J	IgM	Negatif
E254	CME	Haut Bassins	31	M	BOBO SECT	OUI	OUI	non	OUI	non	Non	NON	OUI	NON	NON	NON	NON	NON	NON	GE positif	Positif			11 J	IgG+IgM	Negatif
E255	CME	Haut Bassins	47	M	BOBO SECT	OUI	OUI	non	non	OUI	OUI	NON	OUI	NON	NON	NON	NON	NON	NON	GE positif	Positif			10 J	IgG	Negatif
E256	CME	Haut Bassins	27	M	BOBO SECT	OUI	OUI	non	OUI	non	Non	NON	OUI	NON	NON	NON	NON	NON	NON	GE positif	Positif				NEGATIF	Negatif
E257	CME	Haut Bassins	16	M	BOBO SECT	OUI	OUI	non	OUI	OUI	OUI	NON	OUI	NON	NON	NON	NON	NON	NON	GE positif	Positif			11 J	IgG	Negatif
E258	CME	Haut Bassins	25	M	BOBO SECT	OUI	OUI	non	OUI	non	Non	NON	OUI	NON	NON	NON	NON	NON	NON	GE positif	Positif			10 J	IgG	Negatif
E259	CME	Haut Bassins	2	M	BOBO SECT	OUI	OUI	non	OUI	OUI	OUI	NON	OUI	NON	NON	NON	NON	NON	NON	GE positif	Positif			7 J	NS1+IgM	Positif		DENV 3
E260	CME	Haut Bassins	17	M	BOBO SECT	OUI	OUI	oui	OUI	non	OUI	NON	OUI	NON	NON	NON	NON	NON	NON	NEGATIF	Positif			3 J	NS1	Positif		DENV 3
E261	CME	Haut Bassins	24	M	BOBO SECT	OUI	OUI	non	non	OUI	OUI	NON	OUI	NON	NON	NON	NON	NON	NON	GE positif	Positif			11 J	IgG	Negatif
E262	CME	Haut Bassins	34	F	BOBO SECT	OUI	non	non	OUI	non	Non	NON	Non	NON	NON	NON	NON	NON	NON	NEGATIF	Negatif				NEGATIF	Negatif
E263	CME	Haut Bassins	32	F	BOBO SECT	OUI	OUI	non	OUI	OUI	OUI	NON	OUI	NON	NON	NON	NON	NON	NON	NEGATIF	Negatif				NEGATIF	Negatif
E264	CME	Haut Bassins	51	M	BOBO SECT	OUI	OUI	oui	non	OUI	OUI	NON	OUI	NON	NON	NON	NON	NON	NON	GE positif	Positif			11 J	IgG	Negatif
E265	CME	Haut Bassins	32	F	BOBO SECT	OUI	OUI	non	OUI	non	Non	NON	OUI	NON	NON	NON	NON	NON	NON	NEGATIF	Positif			4 J	NS1	Positif		DENV 1
E266	CME	Haut Bassins	33	M	BOBO SECT	OUI	OUI	non	OUI	OUI	OUI	NON	OUI	NON	NON	NON	NON	NON	NON	GE positif	Positif			6 J	NS1	Positif		DENV 1
E267	CME	Haut Bassins	43	F	BOBO SECT	OUI	OUI	non	OUI	non	Non	NON	OUI	NON	NON	NON	NON	NON	NON	GE positif	Positif			11 J	IgM	Negatif
E268	CME	Haut Bassins	54	M	BOBO SECT	OUI	OUI	non	OUI	OUI	OUI	NON	Non	NON	NON	NON	NON	NON	NON	NEGATIF	Negatif			10 J	IgM	Negatif
E269	CME	Haut Bassins	21	M	BOBO SECT	non	non	non	OUI	non	OUI	OUI	Non	NON	NON	NON	NON	NON	NON	NEGATIF	Negatif				NEGATIF	Negatif
E270	CME	Haut Bassins	42	F	BOBO SECT	OUI	non	non	OUI	non	OUI	NON	OUI	NON	NON	NON	NON	NON	NON	NEGATIF	Negatif				NEGATIF	Negatif
E271	CME	Haut Bassins	48	F	BOBO SECT	OUI	non	non	OUI	non	OUI	NON	OUI	NON	NON	NON	NON	NON	NON	NEGATIF	Negatif				NEGATIF	Negatif
E272	CME	Haut Bassins	28	M	BOBO SECT	OUI	OUI	non	OUI	non	Non	NON	OUI	NON	NON	NON	NON	NON	NON	NEGATIF	Negatif				NEGATIF	Negatif
E273	CME	Haut Bassins	32	F	BOBO SECT	OUI	OUI	non	OUI	non	OUI	NON	OUI	NON	NON	NON	NON	NON	NON	GE positif	Positif				NEGATIF	Negatif
E274	CME	Haut Bassins	61	F	BOBO SECT	OUI	OUI	non	OUI	non	Non	NON	OUI	NON	NON	NON	NON	NON	NON	NEGATIF	Negatif				NEGATIF	Negatif
E275	CME	Haut Bassins	28	M	BOBO SECT	OUI	OUI	oui	OUI	non	OUI	NON	OUI	NON	NON	NON	NON	NON	NON	GE positif	Positif				NS1+IgG	Positif		DENV3
E276	CME	Haut Bassins	2	M	BOBO SECT	OUI	OUI	non	OUI	non	OUI	NON	OUI	NON	NON	NON	NON	NON	NON	NEGATIF	Negatif				NEGATIF	Negatif
E277	CME	Haut Bassins	18	M	BOBO SECT	non	OUI	oui	OUI	OUI	OUI	NON	OUI	NON	NON	NON	NON	NON	NON	NEGATIF	Negatif				IgM	Negatif
E278	CME	Haut Bassins	24	F	BOBO SECT	OUI	OUI	non	OUI	OUI	OUI	NON	OUI	NON	NON	NON	NON	NON	NON	GE positif	Positif				IgM	Negatif
E279	CME	Haut Bassins	34	F	BOBO SECT	OUI	OUI	non	non	OUI	OUI	NON	OUI	NON	NON	NON	NON	NON	NON	NEGATIF	Negatif				NEGATIF	Negatif
E280	CME	Haut Bassins	45	M	BOBO SECT	OUI	OUI	non	OUI	OUI	OUI	NON	OUI	NON	NON	NON	NON	NON	NON	NEGATIF	Negatif				NEGATIF	Negatif
E281	CME	Haut Bassins	18	F	BOBO SECT	OUI	non	non	non	OUI	OUI	NON	OUI	NON	NON	NON	NON	NON	NON	NEGATIF	Negatif				NEGATIF	Negatif
E282	CME	Haut Bassins	48	M	BOBO SECT	OUI	OUI	non	non	OUI	OUI	NON	OUI	NON	NON	NON	NON	NON	NON	NEGATIF	Negatif				NEGATIF	Negatif
E283	CME	Haut Bassins	35	M	BOBO SECT	OUI	OUI	non	non	OUI	OUI	NON	OUI	NON	NON	NON	NON	NON	NON	NEGATIF	Negatif				NEGATIF	Negatif
E284	CME	Haut Bassins	23	M	BOBO SECT	OUI	OUI	non	non	OUI	Non	NON	OUI	NON	NON	NON	NON	NON	NON	NEGATIF	Negatif				NEGATIF	Negatif
E285	CME	Haut Bassins	31	F	BOBO SECT	OUI	OUI	non	OUI	OUI	OUI	NON	OUI	NON	NON	NON	NON	NON	NON	NEGATIF	Negatif				NEGATIF	Negatif
E286	CME	Haut Bassins	42	M	BOBO SECT	OUI	OUI	non	OUI	OUI	Non	NON	OUI	NON	NON	NON	NON	NON	NON	NEGATIF	Negatif				NEGATIF	Negatif
E287	CME	Haut Bassins	34	F	BOBO SECT	OUI	OUI	non	non	non	OUI	NON	OUI	NON	NON	NON	NON	NON	NON	GE Positif	Positif				IgM+IgG	Negatif
E288	CME	Haut Bassins	18	M	BOBO SECT	OUI	OUI	oui	non	OUI	OUI	NON	OUI	NON	NON	NON	NON	NON	NON	NEGATIF	Negatif				NEGATIF	Negatif
E289	CME	Haut Bassins	48	M	BOBO SECT	OUI	OUI	non	non	non	OUI	NON	OUI	NON	NON	NON	NON	NON	NON	NEGATIF	Negatif				NEGATIF	Negatif
E290	CME	Haut Bassins	35	M	BOBO SECT	OUI	non	non	non	OUI	OUI	NON	OUI	NON	NON	NON	NON	NON	NON	NEGATIF	Negatif				NEGATIF	Negatif
E291	CME	Haut Bassins	23	M	BOBO SECT	non	non	non	OUI	non	OUI	NON	Non	NON	NON	NON	NON	NON	NON	NEGATIF	Negatif				NEGATIF	Negatif
E292	CME	Haut Bassins	31	M	BOBO SECT	OUI	non	non	OUI	OUI	OUI	NON	OUI	NON	NON	NON	NON	NON	NON	NEGATIF	Negatif				NEGATIF	Negatif
E293	CME	Haut Bassins	42	F	BOBO SECT	non	non	non	OUI	OUI	OUI	NON	OUI	NON	NON	NON	NON	NON	NON	NEGATIF	Negatif				NEGATIF	Negatif
E294	CME	Haut Bassins	37	F	BOBO SECT	OUI	non	oui	OUI	OUI	OUI	NON	OUI	NON	NON	NON	NON	NON	NON	NEGATIF	Negatif				NEGATIF	Negatif
E295	CME	Haut Bassins	38	M	BOBO SECT	OUI	OUI	non	OUI	OUI	Non	NON	OUI	NON	NON	NON	NON	NON	NON	NEGATIF	Negatif				NEGATIF	Negatif
E296	CME	Haut Bassins	66	F	BOBO SECT	OUI	OUI	non	OUI	OUI	OUI	OUI	OUI	NON	NON	NON	NON	NON	NON	NEGATIF	Negatif				NEGATIF	Negatif
E297	CME	Haut Bassins	17	F	BOBO SECT	non	OUI	non	OUI	OUI	Non	NON	OUI	NON	NON	NON	NON	NON	NON	NEGATIF	Negatif				NEGATIF	Negatif
E298	CME	Haut Bassins	47	M	BOBO SECT	OUI	OUI	non	OUI	OUI	OUI	NON	OUI	NON	NON	NON	NON	NON	NON	GE positif	Positif				NS1+IgM	Positif		DENV1
E299	CME	Haut Bassins	22	M	BOBO SECT	OUI	OUI	non	OUI	OUI	OUI	NON	OUI	NON	NON	NON	NON	NON	NON	NEGATIF	Negatif				NEGATIF	Negatif
E300	CME	Haut Bassins	31	M	BOBO SECT	OUI	OUI	non	non	non	OUI	NON	OUI	NON	NON	NON	NON	NON	NON	NEGATIF	Negatif				NEGATIF	Negatif
E301	CME	Haut Bassins	18	F	BOBO SECT	OUI	OUI	non	non	non	OUI	NON	Non	NON	NON	NON	NON	NON	NON	NEGATIF	Negatif				NEGATIF	Negatif
E302	CME	Haut Bassins	40	M	BOBO SECT	OUI	OUI	non	OUI	non	OUI	NON	OUI	NON	NON	NON	NON	NON	NON	NEGATIF	Negatif				NEGATIF	Negatif
E303	CME	Haut Bassins	27	M	BOBO SECT	non	OUI	oui	OUI	non	Non	NON	OUI	NON	NON	NON	NON	NON	NON	NEGATIF	Negatif				NEGATIF	Negatif
E304	CME	Haut Bassins	12	F	BOBO SECT	OUI	non	non	OUI	non	Non	NON	Non	NON	NON	NON	NON	NON	NON	NEGATIF	Negatif				NEGATIF	Negatif
E305	CME	Haut Bassins	18	M	BOBO SECT	OUI	OUI	non	non	OUI	OUI	NON	Non	NON	NON	NON	NON	NON	NON	NEGATIF	Negatif				NEGATIF	Negatif
E306	CME	Haut Bassins	32	M	BOBO SECT	OUI	OUI	non	non	OUI	OUI	NON	Non	NON	NON	NON	NON	NON	NON	NEGATIF	Negatif				NEGATIF	Negatif

## Sheet: Analyse
				Coinfection probable DENV-Malaria(GE+PCR)				Coinfection DENV Malaria
				NS1-Malaria 14/306				Juin pcr+;GE - :0/40 0.0%; GE+PCR+: 1/40 2.5%
				NS1+IgM-Malaria 6/306				Juillet pcr+ ,GE N: 2/53 3.77% ; GE+PCR+: 3/53 5.66%
				NS1+IgG-Malaria 3/306				Aout pcr+ ,GE N: 5/213 2.34%;GE+PCR+: 19/213 8.92%
				IgM- Malaria 26/306
				IgG- Malaria 23/306
				IgM+IgG-Malaria 16/306				Total pcr+ GE N: 7/306 GE+PCR+: 23/306
						Coinfection	DENV mono	malaria mono	Negative
					DENV RT-PCR-Malaria microscopy	5.22% 16/306	2.94% 9/306	45.75% 140/306	46.09% 141/306
					DENV RT-PCR-Malaria PCR	7.51% 23/306	2.94% 9/306	44.44% 136/306	45.11% 138/306
